# Supplementary material
Source: Research Square preprint supplement (doi:10.21203/rs.3.rs-9325069/v1)
Supplement: Supplementary file 1 [file 49f637b50cd754ccfff7c390.docx]

**Supplementary Table 2.** Primers used for qPCR

|  | **Primer** | **Forward (5’ -> 3’)** | **Reverse (5’ -> 3’)** |
| --- | --- | --- | --- |
| ***human*** | ***GAPDH*** | PPH00150F | |
| ***P2RY12*** | PPH02545B | |
| ***OLFML3*** | PPH07681A | |
| ***TGFBR1*** | PPH00237C | |
| ***TNF*** | PPH00341F | |
| ***CCL4*** | PPH00563B | |
| ***MDM2*** | PPH00193E | |
| ***NME1*** | PPH01314B | |
| ***ZMAT3*** | PPH02180B | |
| ***SHISA5*** | PPH19699A | |
| ***mouse*** | ***Gapdh*** | CGACCTTCACCATTTTGTCTACA | GCTTAAGAGACAGCCGCATCT |
| ***Mdm2*** | CAAGAGACTCTGGTTAGACCAAAAC | TCGGGACTCCAAACACATCTC |
| ***Tnf*** | GAGTCCGGGCAGGTCTACTTT | CAGGTCACTGTCCCAGCATCT |
| ***Il1b*** | GGCTGGACTGTTTCTAATGC | ATGGTTTCTTGTGACCCTGA |
| ***Il6*** | AGCCAGAGTCCTTCAGAGAGAT | GAGAGCATTGGAAATTGGGGT |
| ***Ccl2*** | GACCCCAAGAAGGAATGGGT | GACCTTAGGGCAGATGCAGTT |
| ***Tgfb1*** | TGACGTCACTGGAGTTGTACGG | GGTTCATGTCATGGATGGTGC |
| ***Arg1*** | GGAATCTGCATGGGCAACCTGTGT | AGGGTCTACGTCTCGCAAGCCA |
| ***Igf1*** | GTACCGGCACAACTACTGCT | AGCCTGCTTCTCAGCTTCAG |
| ***Bdnf*** | ACTGCAGTGGACATGTCTGG | CTGCAGCCTTCCTTGGTGTA |
| ***Slc2a1*** | ACCATCTTGGAGCTGTTCCG | GCCTTCTCGAAGATGCTCGT |
| ***Ldha*** | CCTGTGTGGAGTGGTGTGAA | CCTCCTTCCACTGCTCCTTG |
| ***Slc16a3*** | CGGCTTGGATCTCCTCCATC | ATTCCCAGGGACGCAAAGAG |
| ***Pkm*** | CCTCCAGTCACTCCACAGAC | GGGATTTCGAGTCACGGCAA |
| ***Hif1a*** | AGTGCTGATCCTGCACTGAA | AGGCTGGGAAAAGTTAGGAGTG |
| ***Hk1*** | CCGAGCTGAAGGATGACCAA | GGAATGGACCGGACAAAGGT |
| ***Hk2*** | GATCGCCTCGCATATGATCG | GTGGTAGCTCCTAGCCCCTT |
| ***Gpi1*** | TTGTCGCCCTGTCTACGAAC | AGCTGCTCGAAGTGGTCAAA |
| ***Pfkm*** | GCTCAGTGAGACAAGGACCC | TCAAAGGCTGATGGTGTCCC |
| ***Pfkl*** | ACGTGAAGGATCTGGTGGTTC | GGATTCGGTCGAAGGCTGAA |
| ***Pfkp*** | TGAGGCTCGAAACAACCATGA | CAGGGCAGTATCACAACCGAT |
| ***Tpi1*** | CGTGTTCGAGCAAACCAAGG | GAGCCACCCCATCATTGACA |
| ***Aldoa*** | ATTCTCCCTGATGGGGACCA | GCTTCAGCAATGTGCCTTCC |
| ***Pgk1*** | CCACAGAAGGCTGGTGGATT | TGTCTGCAACTTTAGCGCCT |
| ***Pgam1*** | CACTATGGCGGTCTGACAGG | AGGGGAGCTGGTCTTCAGTA |
| ***Eno1*** | AGGTACATCACTCCCGACCA | CGCTTAGGGTTGGTCACTGT |
| ***Eno2*** | AAGGATGCCACTAACGTGGG | AACTCAGAGGCAGCCACATC |
|  | ***Ldhb*** | AGTCTCCCTCCAGGAACTGA | GGTGAATCCGGGAGAGGTTT |
