# Supplementary material
Source: Research Square preprint supplement (doi:10.21203/rs.3.rs-9325069/v1)
Supplement: Supplementary file 2 [file 87d3618d1afb8ad3d1c0d975.docx]

Supporting information for

**MDM2-linked microglial dysfunction in obsessive-compulsive disorder**

Soyoung Sung *et al.*

*Corresponding author: Min-Soo Kwon, [minsoo100@cha.ac.kr](mailto:minsoo100@cha.ac.kr)

**This PDF file includes:**

Supplementary materials and methods

Figs. S1 to S3

Table S1 to S4

**Supplementary materials and methods**

*Western blot analysis*

Primary microglia or acutely-isolated microglia from whole brains of mice were lysed in RIPA buffer (Sigma-Aldrich, #R0278) supplemented with protease and phosphatase inhibitors (Thermo Fisher Scientific, #A32959). Protein concentrations were measured through a detergent-compatible protein assay reagent (Bio-Rad, #5000006) using Bovine Serum Albumin (BSA) as a standard. 10 μg of protein was loaded and run on sodium dodecyl sulfate-PAGE (15 well, 8-13.5% Bis-Tris gel) at 80 V 30 min and 120 V 60 min, then transferred to polyvinylidene difluoride (PVDF) membranes at 280 mA for 180 min. The membranes were blocked for 1 h on a shaker using Tris-buffered saline/0.1% Tween 20 (TBS-T) and 3% BSA followed by incubation with the primary antibodies overnight at 4 °C. The membranes were washed four times in TBS-T and incubated 1 h with secondary antibodies. Finally, the membranes were visualized using ECL solution (Dyne Bio, #GBE-C100) and exposed to chemiluminescence using LAS-4000 (Fujifilm, Tokyo, Japan). The immunoreactive bands were quantified by using ImageJ 1.51 and Fusion FX (Vilber Lourmat, Marne-la-Vallée, France) software. Protein bands were normalized to GAPDH and relative protein expression was normalized to the control conditions in each experiment. For each condition, three or four biological replicates were evaluated. Antibodies used in this experiment are below. MDM2 antibody (1:1000, Cell Signaling Technology, #51541, mouse), MDM2 antibody (1:1000, Cell Signaling Technology, #86934, human) p-PI3K antibody (1:1000, Cell Signaling Technology, #4228), PI3K antibody (1:1000, Cell Signaling Technology, #4257), p-Akt antibody (1:1000, Cell Signaling Technology, #9271), Akt antibody (1:1000, Cell Signaling Technology, #9272), p-NFkB antibody (1:1000, Cell Signaling Technology, #3033), NFkB antibody (1:1000, Abcam, #ab16502), p-mTOR antibody (1:1000, Cell Signaling Technology, #5536), mTOR antibody (1:1000, Cell Signaling Technology, #2972), furin antibody (1:1000, Invitrogen, #PA1-062), BDNF antibody (1:1000, Abcam, #ab108319), vinculin antibody (1:1000, Cell Signaling Technology, #4650), GAPDH antibody (1:1000, Cell Signaling Technology, #2118).

*Immunocytochemistry*

The cells were fixed with 4% paraformaldehyde (PFA) and were permeabilized with 0.5% Triton X-100 for 10 min. Indirect immunofluorescence was performed using the following primary antibodies: anti-IBA1 (Wako, #019-19741; 1:500), P2Y12 (Abcam, #ab140862; 1:500), TMEM119 (Novus Biologicals, #NBP2-30551; 1:500), MDM2 (Cell Signaling Technology, #86934, 1:500). The cells were incubated with the primary antibodies diluted in 0.5% Triton X-100 (Thermo Fisher Scientific, #T8787) in PBS (Welgene, #LB 004-01) containing 1% normal donkey serum (Abcam, #ab7475) at 4 °C overnight. After rinsing thrice with 0.5% Triton X-100 in PBS for 15 min, Donkey anti-rabbit Alexa 488-conjugated secondary antibody (Invitrogen, #A-21206, 1:200) or Donkey anti-rabbit Alexa 647-conjugated secondary antibody (Invitrogen, #A-31573, 1:200) were used for detection. Cells were mounted using ProLongTM Gold Antifade mounting solution with DAPI (Invitrogen, #P36931). Fluorescent images were taken using a confocal microscope (TCS SP5 II; Leica Microsystems). MDM2 fluorescence intensity was quantified in donor-derived iMGs, and all available iMG lines with imaging data were included in the analysis (each dot represents one donor). For each donor, 3 non-overlapping fields and image analysis was performed. Quantification was performed in Fiji/ImageJ by identifying iMGs based on IBA1 positivity and segmenting nuclei from the DAPI channel using a uniform threshold across images. Nuclear MDM2 signal was measured as the background-subtracted mean fluorescence intensity within the DAPI-defined nuclear ROI. Nuclear intensity values were averaged across cells and fields to generate a single value per donor for statistical comparisons.

*Purification and fluorescent labeling of synaptosomes*

Forebrain tissue from one adult male C57BL/6 mouse (Orient Bio Inc., Seoul, Korea) was dissected excluding the cerebellum and trimmed to 200-400 mg wet weight. The tissue was immediately transferred to a pre-measured volume of Syn-PERTM Synaptic Protein Extraction Reagent (Thermo Fisher Scientific, #87785) at a 1:10 w/v ratio and homogenized in a 7 mL Dounce tissue grinder using 10 uniform up and down strokes. The homogenate was clarified by centrifugation at 1,200 × g for 10 min to remove debris. The resulting supernatant was then centrifuged at 15,000 × g for 20 min to pellet the synaptosomal fraction. Pellets were gently resuspended in fresh Syn-PER. For pH-sensitive fluorescent tagging, synaptosomes were reacted with an amine-reactive succinimidyl-ester dye (pHrodoTM Red, Thermo Fisher Scientific, #P36600) prepared in 0.1M sodium carbonate buffer (pH 9.0). Suspensions were incubated at room temperature for 2 h with intermittent gentle mixing for labeling. Unreacted dye was removed by repeated cycles of pelleting (15,000 × g, 10 min) and resuspension in buffer until the supernatant was visibly free of dye. The final pHrodo-conjugated synaptosome pellet was resuspended in an isotonic storage buffer supplemented with 5% (v/v) DMSO, aliquoted, and stored frozen for subsequent phagocytosis assays.

*Phagocytosis assay*

To quantify phagocytosed beads (2 μm; Sigma-Aldrich, #L3030) and pHrodo Red Zymosan BioParticles conjugate (Thermo Fisher Scientific, #P35364) of iMGs, optimally cultured iMGs for 14 days were treated with 2 μL red fluorescent latex beads and pHrodo Red Zymosan BioParticles for 2 h at 37 °C. Phagocytic activity was then stopped by adding 2 mL ice-cold PBS. The cells were washed twice with ice-cold PBS, fixed with PFA and stained with a microglial marker counterstained with DAPI. The cells were analyzed using confocal microscopy. Synaptosome uptake was assessed by live imaging. pHrodo-labeled synaptosomes (2 μL/well) were added to primary microglia and iMGs and monitored live for 2 h at 37 °C on a JuLi Stage live cell imaging device (NanoEnTek Inc., Seoul, South Korea). No fixation or post-staining was performed, and phagocytosis was quantified from the time-lapse recordings.

*Enzyme-Linked Immunosorbent Assay (ELISA)*

Plasma C-reactive protein (CRP) concentrations were measured using the Quantikine® Human CRP ELISA Kit (R&D Systems, # DCRP00B) according to the manufacturer’s instructions. Briefly, plasma samples were diluted 1:100 in the supplied calibrator diluent and added in duplicate to 96-well microplates pre-coated with a monoclonal anti-human CRP antibody. After incubation and washing, horseradish peroxidase conjugated detection antibody and substrate solution were sequentially applied. The colorimetric reaction was stopped and absorbance was measured at 450 nm with wavelength correction at 570 nm using a SpectraMax iD5 microplate reader (Molecular Devices, San Jose, CA, USA). Sample concentrations were interpolated from a standard curve constructed using recombinant CRP and analyzed by four-parameter logistic regression in GraphPad Prism (version 10; GraphPad, La Jolla, CA, USA).

**Supplementary figures**


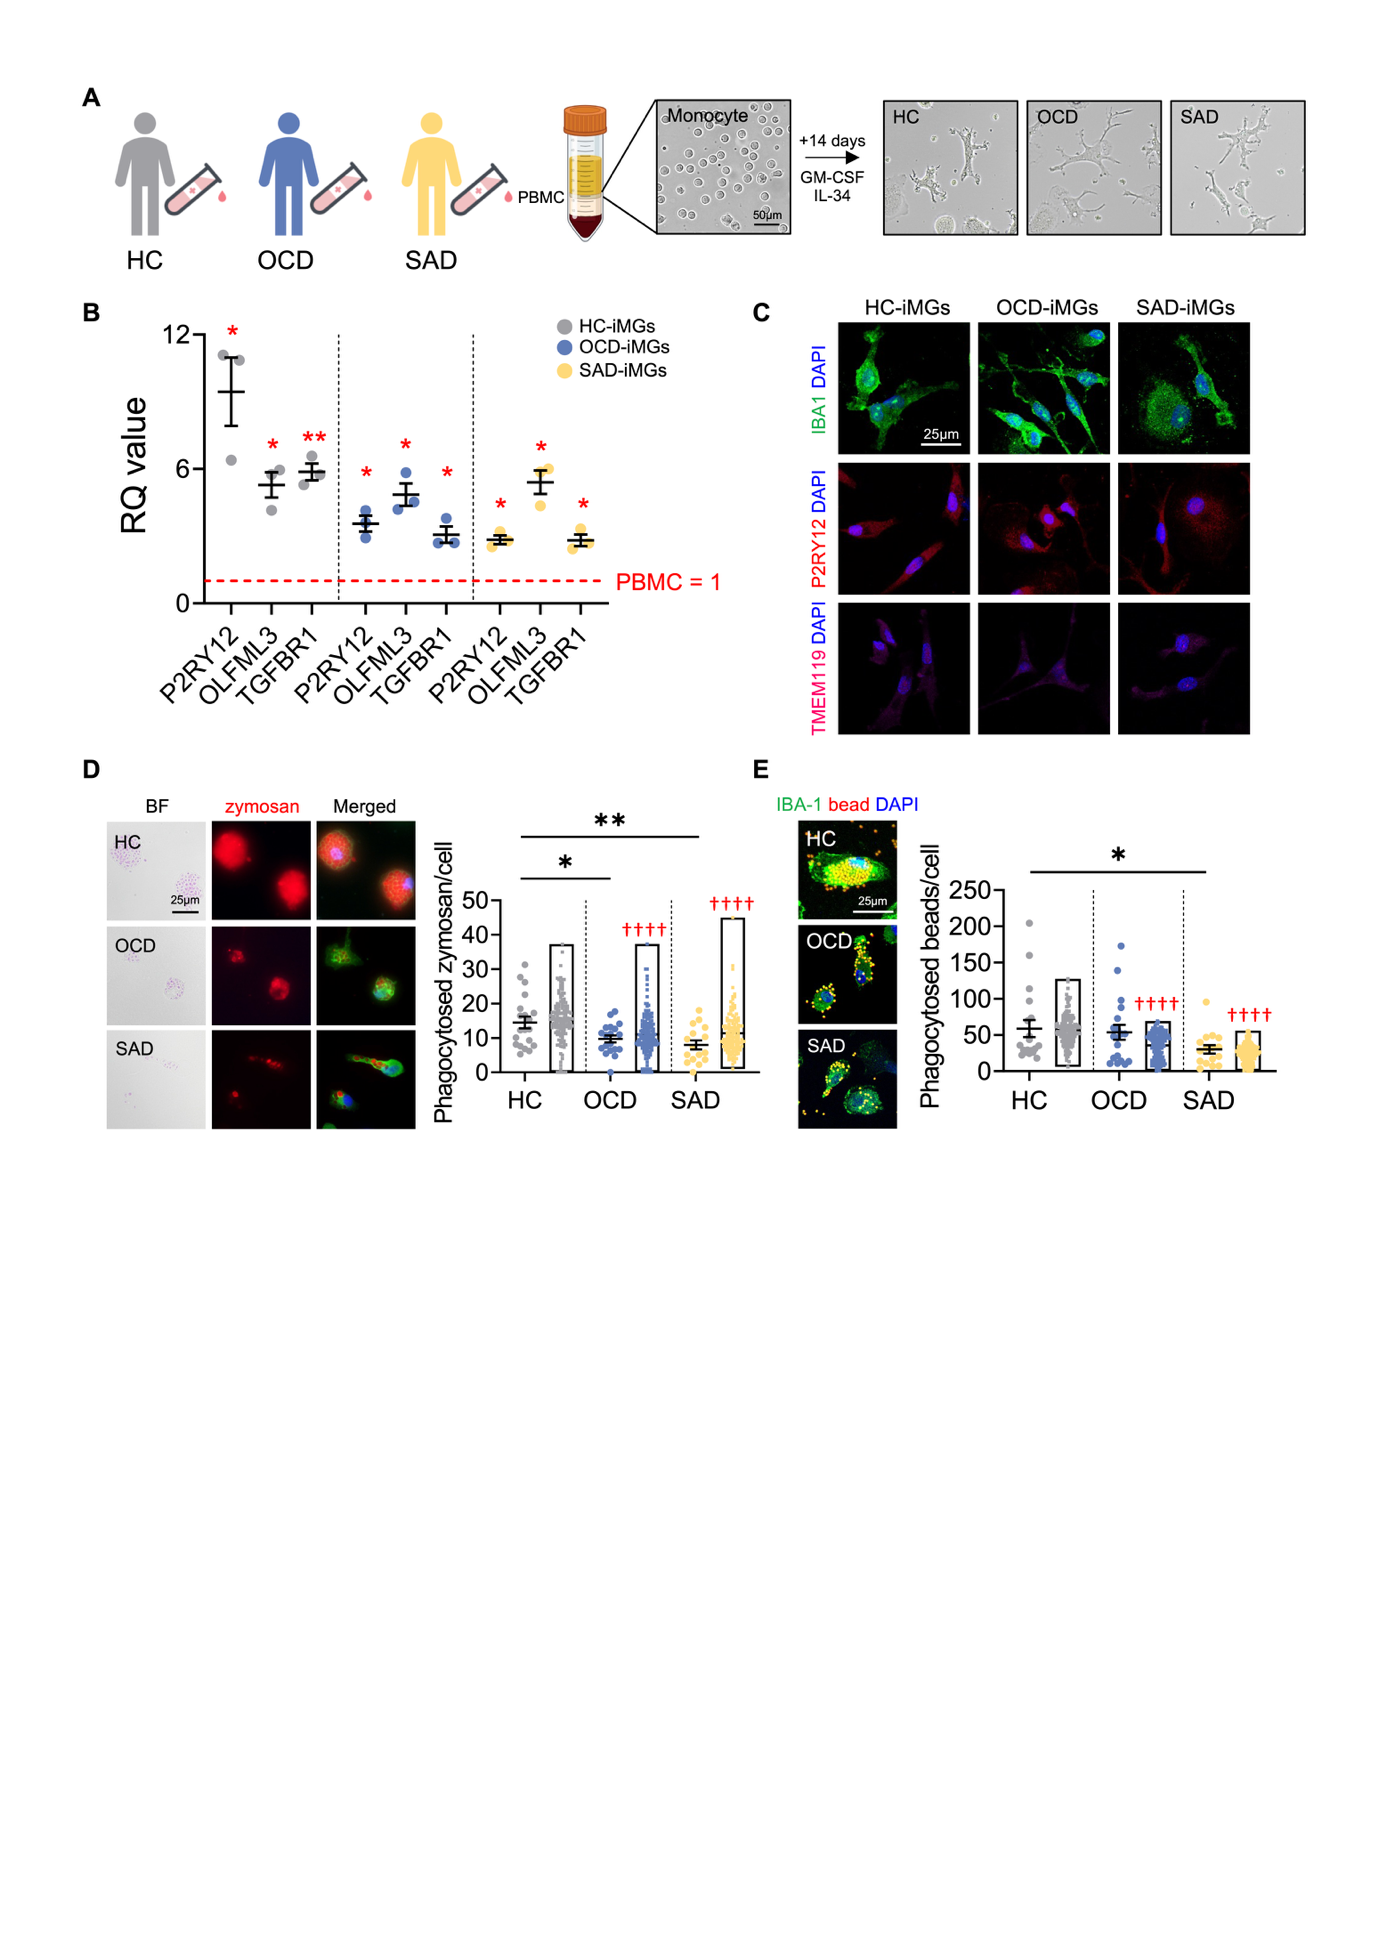


**Supplementary figure 1. Establishment of iMGs from patients with OCD and SAD**

(A) Peripheral blood mononuclear cells were isolated from OCD, SAD, and HC, then cultured for 14 days in GM-CSF and IL-34 to generate microglia-like cells. The schematic illustrates the recruitment of donors, isolation of monocytes, and the timeline of differentiation. The bright-field images on the right show ramified morphology after differentiation.

(B) qRT-PCR analysis of microglial signature genes demonstrates successful acquisition of a microglial phenotype. Relative quantification (RQ) values of P2RY12, OLFML3, and TGFBR1 were normalized to peripheral blood monocytes (PBMC = 1, dashed red line). iMGs from all three groups showed significant increase of microglial markers compared with PBMCs. Data points represent independent donors (n=3).

(C) Immunofluorescence for microglial markers confirms appropriate protein expression. Representative images of HC-, OCD-, SAD-iMGs stained for IBA1 (green), P2RY12 (red), and TMEM119 (magenta) show robust marker expression. DAPI staining (blue) indicates nuclei.

**
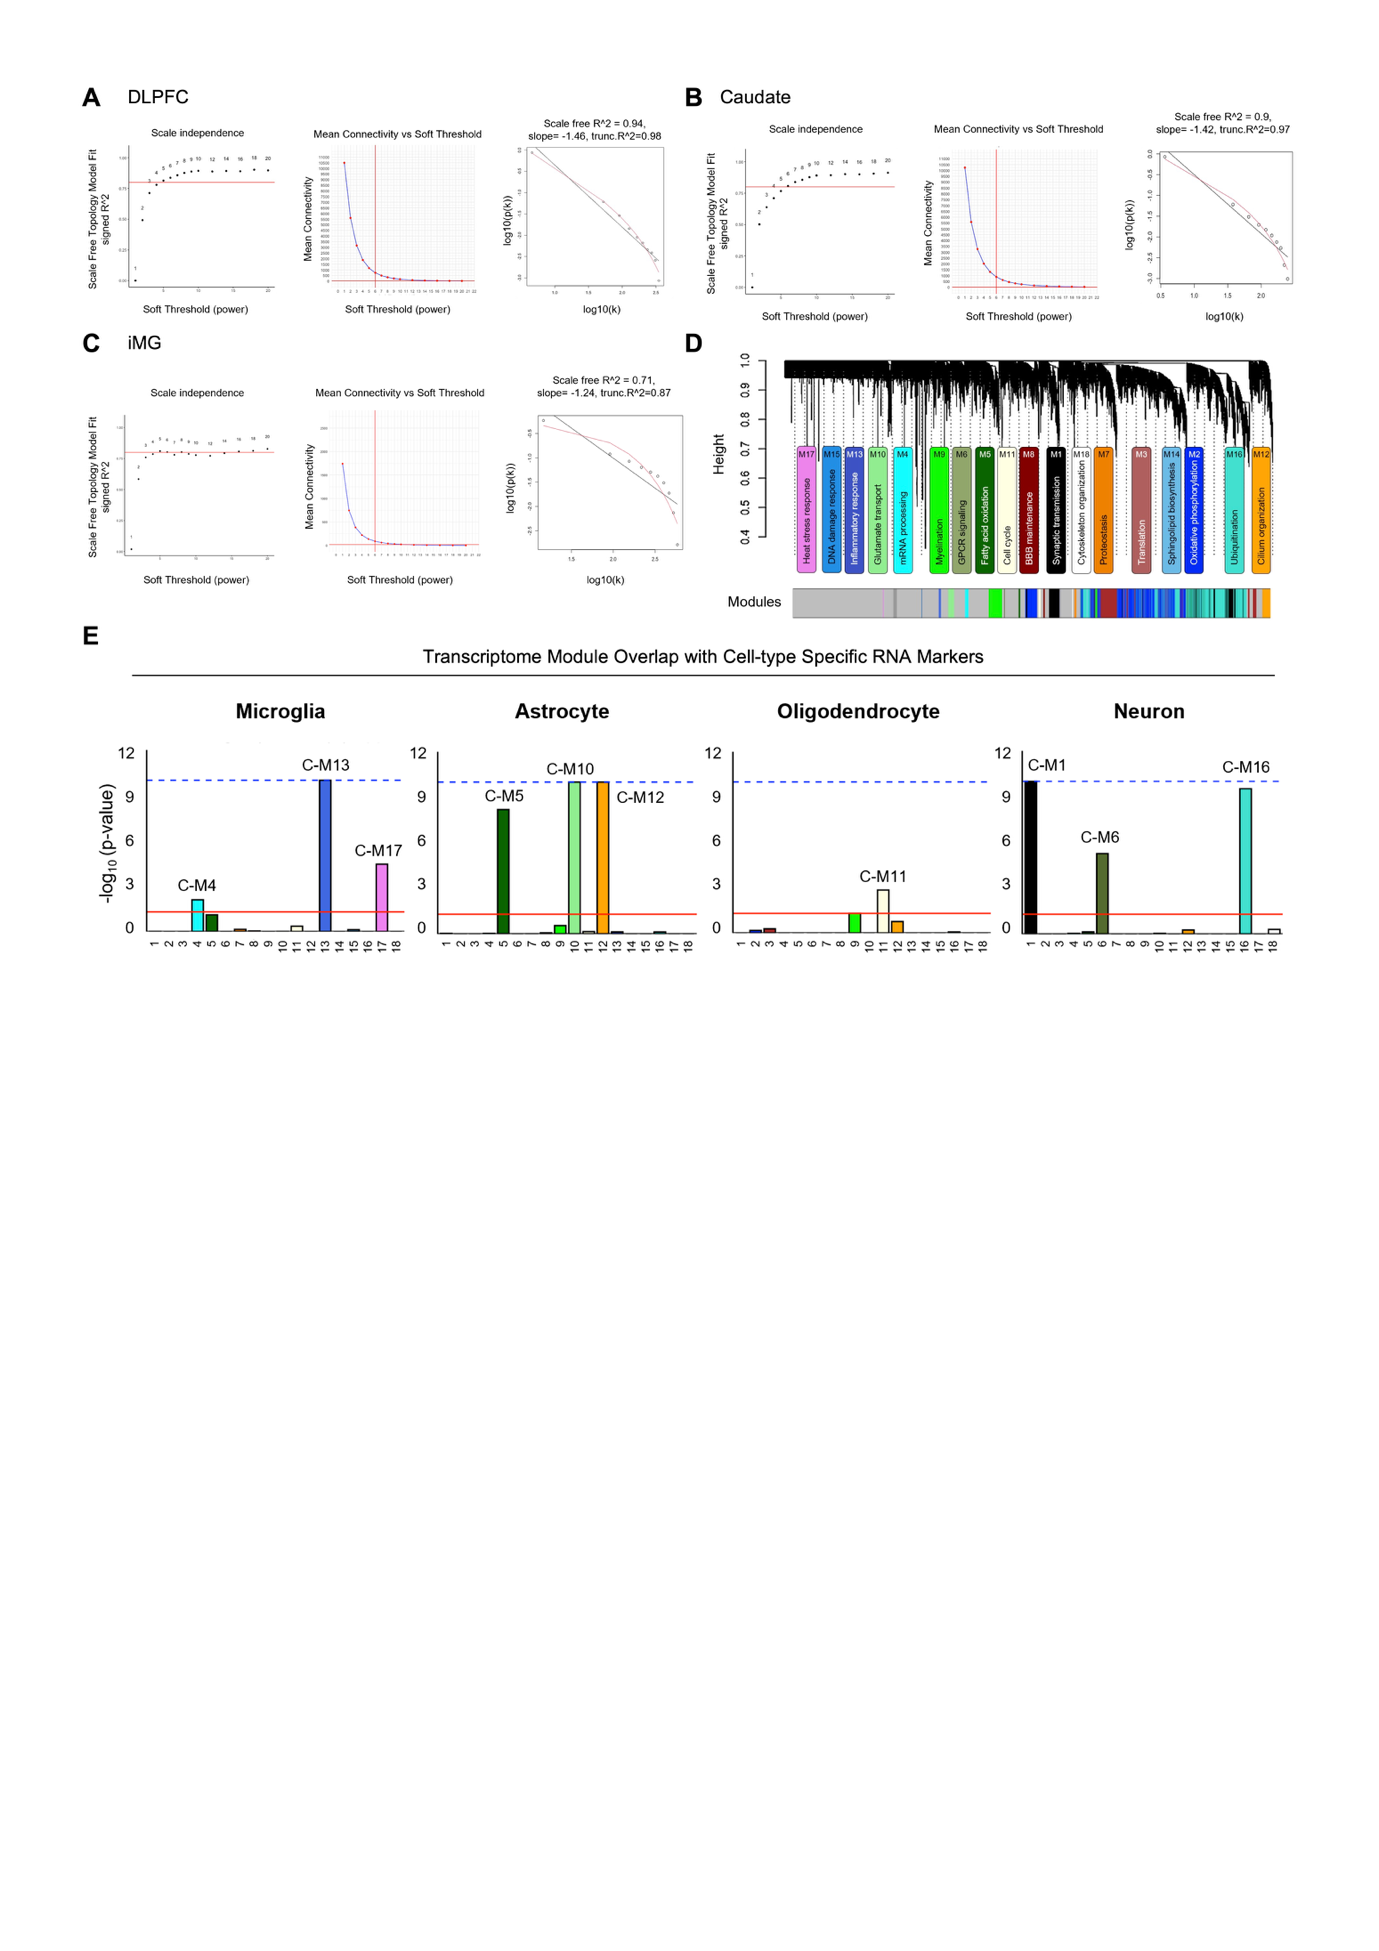
**

**Supplementary figure 2. Weighted gene co-expression network analysis (WGCNA) of** **postmortem caudate samples from OCD and control subjects**

(A) Determination of the soft‑thresholding power used in WGCNA for DLPFC dataset. To achieve a scale‑free topology while preserving network connectivity, a soft‑thresholding power of β = 12 was chosen. The left plot shows the scale‑free topology model fit index (R²) across candidate β values; R² increases steeply at low β and plateaus around 0.8–0.9. The horizontal dashed line indicates the recommended scale‑free topology threshold. The middle plot displays the mean network connectivity (average degree) versus β; connectivity declines exponentially with increasing β, reflecting the progressive sparsification of the network. The right plot depicts the relationship between log10 of node connectivity (k) and log10 of the frequency distribution P(k) at the selected power (β = 12).

(B) The same approach was applied to the caudate dataset. Here, the scale‑free topology index curve rose more gradually, necessitating a higher power to achieve the desired R². At β = 14, the scale‑free fit index crosses the threshold and the mean connectivity remains adequate. The log–log degree distribution at this power shows a pronounced linear trend with a negative slope, confirming that the resulting network approximates a scale‑free topology.

(C) For the iMGs dataset, the scale‑free topology curve showed a lower maximum R² than the brain tissues, reflecting the reduced sample complexity. Nevertheless, a soft‑threshold of β = 16 was chosen to balance an acceptable scale‑free topology index with the preservation of mean connectivity. The log–log plot of node degree versus frequency at β = 16 displays a linear relationship.

(D) Hierarchical clustering of genes in the caudate expression matrix. The dendrogram depicts 18 color-coded modules of co-expressed genes. Gene ontology enrichment assigned functional annotations to each module.

(E) Bar plots depict −log₁₀(p‑values) from one‑tailed Fisher’s exact tests comparing gene membership of each caudate module with curated microglial, astrocytic, oligodendrocytic and neuronal marker lists. FDR correction was applied across all tests within the caudate panel. The red horizontal line denotes the statistical significance threshold of −log₁₀(p-value) = 1.3 (corresponding to P = 0.05). For visualization, bars exceeding a value of 10 were truncated at 10 and capped by a blue dashed line. Modules above the dashed line are therefore strongly enriched for the corresponding cell‑type markers. Labels at the top of each panel highlight the most significantly enriched modules per cell type: microglia (C‑M4, C‑M13, and C‑M17), astrocyte (C‑M5, C-M10, and C‑M12), oligodendrocyte (C‑M11) and neuron (C‑M1, C-M6, and C‑M16).


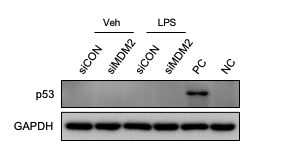


**Supplementary figure 3. p53 expression in primary microglia**

Human ovarian carcinoma cell lines with defined TP53 status were used for comparison. OVCAR-3 (ATCC, #HTB-161) carries a mutant TP53 allele resultingin expression of a dysfunction, whereas SKOV3 (ATCC, #HTB-77 harbors a TP53 H179R loss-of-function mutation and does not produce functional p53. Cell pellets were obtained from a collaborating laboratory and were not cultured in our facility. Proteins were immediately extracted in RIPA buffer and analyzed by western blotting. (PC; positive control, NC; negative control)

**Supplementary Table Legends**

**Supplementary Table 1. Characteristics of the study participants**

**Supplementary Table 2. Primers used for qPCR**

**Supplementary Table 3. Detailed information of pathway enrichment analysis**

**Supplementary Table 4. Correlations between microglia-like cell markers and clinical symptom severity in patients with OCD**
