# Supplementary material
Source: Research Square preprint supplement (doi:10.21203/rs.3.rs-9325069/v1)
Supplement: Supplementary file 3 [file 8a5d9a3c9aac78c712830755.xlsx]

## Sheet: OCD_KEGG
Supplementary Table 3. Detailed information of pathway enrichment analysis
Category	Term	Count	%	PValue	Genes	List Total	Pop Hits	Pop Total	Fold Enrichment	Bonferroni	Benjamini	FDR
KEGG_PATHWAY	hsa04115:p53 signaling pathway	5	2.55102	0.00706743	CCND3, RRM2B, ZMAT3, MDM2, SHISA5	88	75	8534	6.46515	0.72496	1	1
KEGG_PATHWAY	hsa04110:Cell cycle	6	3.06122	0.022374	CCND3, NIPBL, PTTG1, ESCO1, MDM2, MCM5	88	158	8534	3.68268	0.983728	1	1
KEGG_PATHWAY	hsa04922:Glucagon signaling pathway	5	2.55102	0.0235006	CAMK2D, PKM, PPP4R3A, ACACB, FBP1	88	107	8534	4.53165	0.986808	1	1
KEGG_PATHWAY	hsa04925:Aldosterone synthesis and secretion	4	2.04082	0.0781104	KCNJ5, CAMK2D, PRKD3, ATP2B4	88	98	8534	3.95826	1	1	1
KEGG_PATHWAY	hsa04141:Protein processing in endoplasmic reticulum	5	2.55102	0.0952248	ATXN3, SEL1L, DNAJC10, CALR, SEC63	88	170	8534	2.85227	1	1	1

## Sheet: OCD_Reactome
Category	Term	Count	%	PValue	Genes	List Total	Pop Hits	Pop Total	Fold Enrichment	Bonferroni	Benjamini	FDR
REACTOME_PATHWAY	R-HSA-8934593~Regulation of RUNX1 Expression and Activity	3	1.53061	0.0120332	CCND3, AGO3, TNRC6A	115	17	11494	17.6379	0.99898	1	1
REACTOME_PATHWAY	R-HSA-9730414~MITF-M-regulated melanocyte development	6	3.06122	0.0189608	ATP6V0B, CSF1, AGO3, TFEC, MCM5, TNRC6A	115	155	11494	3.86895	0.999981	1	1
REACTOME_PATHWAY	R-HSA-2559585~Oncogene Induced Senescence	3	1.53061	0.0421661	AGO3, MDM2, TNRC6A	115	33	11494	9.08617	1	1	1
REACTOME_PATHWAY	R-HSA-9022692~Regulation of MECP2 expression and activity	3	1.53061	0.0445174	CAMK2D, AGO3, TNRC6A	115	34	11494	8.81893	1	1	1
REACTOME_PATHWAY	R-HSA-9634815~Transcriptional Regulation by NPAS4	3	1.53061	0.0445174	AGO3, MDM2, TNRC6A	115	34	11494	8.81893	1	1	1
REACTOME_PATHWAY	R-HSA-5628897~TP53 Regulates Metabolic Genes	4	2.04082	0.0493089	RRM2B, AGO3, COX4I1, TNRC6A	115	83	11494	4.81676	1	1	1
REACTOME_PATHWAY	R-HSA-4839726~Chromatin organization	7	3.57143	0.055786	COPRS, SETD2, PBRM1, ZZZ3, KMT2A, MCRS1, ASH1L	115	275	11494	2.54413	1	1	1
REACTOME_PATHWAY	R-HSA-3247509~Chromatin modifying enzymes	7	3.57143	0.055786	COPRS, SETD2, PBRM1, ZZZ3, KMT2A, MCRS1, ASH1L	115	275	11494	2.54413	1	1	1
REACTOME_PATHWAY	R-HSA-9725370~Signaling by ALK fusions and activated point mutants	4	2.04082	0.0600342	AGO3, MDM2, GCC2, JUNB	115	90	11494	4.44213	1	1	1
REACTOME_PATHWAY	R-HSA-9700206~Signaling by ALK in cancer	4	2.04082	0.0600342	AGO3, MDM2, GCC2, JUNB	115	90	11494	4.44213	1	1	1
REACTOME_PATHWAY	R-HSA-2426168~Activation of gene expression by SREBF (SREBP)	3	1.53061	0.0622448	FDPS, FASN, ACACB	115	41	11494	7.31326	1	1	1
REACTOME_PATHWAY	R-HSA-9772755~Formation of WDR5-containing histone-modifying complexes	3	1.53061	0.0649452	ZZZ3, KMT2A, MCRS1	115	42	11494	7.13913	1	1	1
REACTOME_PATHWAY	R-HSA-72764~Eukaryotic Translation Termination	4	2.04082	0.0666141	RPS28, RPS16, APEH, RPL9	115	94	11494	4.2531	1	1	1
REACTOME_PATHWAY	R-HSA-163765~ChREBP activates metabolic gene expression	2	1.02041	0.0674126	FASN, ACACB	115	7	11494	28.5565	1	1	1
REACTOME_PATHWAY	R-HSA-426496~Post-transcriptional silencing by small RNAs	2	1.02041	0.0674126	AGO3, TNRC6A	115	7	11494	28.5565	1	1	1
REACTOME_PATHWAY	R-HSA-168255~Influenza Infection	5	2.55102	0.072052	RPS28, RPS16, CALR, RPL9, SLC25A6	115	158	11494	3.16291	1	1	1
REACTOME_PATHWAY	R-HSA-9024446~NR1H2 and NR1H3-mediated signaling	3	1.53061	0.076125	AGO3, FASN, TNRC6A	115	46	11494	6.51834	1	1	1
REACTOME_PATHWAY	R-HSA-8948700~Competing endogenous RNAs (ceRNAs) regulate PTEN translation	2	1.02041	0.0766679	AGO3, TNRC6A	115	8	11494	24.987	1	1	1
REACTOME_PATHWAY	R-HSA-9856651~MITF-M-dependent gene expression	4	2.04082	0.0844227	ATP6V0B, AGO3, MCM5, TNRC6A	115	104	11494	3.84415	1	1	1
REACTOME_PATHWAY	R-HSA-5663202~Diseases of signal transduction by growth factor receptors and second messengers	9	4.59184	0.0848793	CAMK2D, CLIP1, AGO3, FBXW7, SEL1L, MDM2, GCC2, JUNB, MIB1	115	458	11494	1.96404	1	1	1
REACTOME_PATHWAY	R-HSA-9768778~Regulation of NPAS4 mRNA translation	2	1.02041	0.0858321	AGO3, TNRC6A	115	9	11494	22.2106	1	1	1
REACTOME_PATHWAY	R-HSA-9759811~Regulation of CDH11 mRNA translation by microRNAs	2	1.02041	0.0858321	AGO3, TNRC6A	115	9	11494	22.2106	1	1	1
REACTOME_PATHWAY	R-HSA-8943723~Regulation of PTEN mRNA translation	2	1.02041	0.0858321	AGO3, TNRC6A	115	9	11494	22.2106	1	1	1
REACTOME_PATHWAY	R-HSA-5696398~Nucleotide Excision Repair	4	2.04082	0.0959846	ERCC1, COPS2, UVSSA, MCRS1	115	110	11494	3.63447	1	1	1

## Sheet: OCD_Wikipathways
Category	Term	Count	%	PValue	Genes	List Total	Pop Hits	Pop Total	Fold Enrichment	Bonferroni	Benjamini	FDR
WIKIPATHWAYS	WP4018:Clear cell renal cell carcinoma pathways	5	2.55102	0.0171827	SETD2, PBRM1, PKM, FASN, ACACB	104	85	8832	4.99548	0.992461	1	1
WIKIPATHWAYS	WP2005:miR targeted genes in muscle cell	10	5.10204	0.0217545	PKM, CAND1, CSRP1, CSF1, AGO3, KCNQ1, RAB34, WDFY1, CAPG, PDLIM7	104	353	8832	2.40575	0.997976	1	1
WIKIPATHWAYS	WP3982:miRNA regulation of p53 pathway in prostate cancer	3	1.53061	0.0503063	ZMAT3, MDM2, SHISA5	104	31	8832	8.21836	1	1	1
WIKIPATHWAYS	WP5117:Cohesin complex Cornelia de Lange syndrome	3	1.53061	0.0593512	NIPBL, PTTG1, ESCO1	104	34	8832	7.49321	1	1	1
WIKIPATHWAYS	WP2003:miR targeted genes in leukocytes	5	2.55102	0.0608378	PKM, CSRP1, RAB34, WDFY1, CAPG	104	127	8832	3.34343	1	1	1
WIKIPATHWAYS	WP138:Androgen receptor signaling	4	2.04082	0.0810042	ROCK2, MDM2, CALR, NR2C2	104	87	8832	3.90451	1	1	1

## Sheet: SAD_KEGG
Category	Term	Count	%	PValue	Genes	List Total	Pop Hits	Pop Total	Fold Enrichment	Bonferroni	Benjamini	FDR
KEGG_PATHWAY	hsa04061:Viral protein interaction with cytokine and cytokine receptor	7	8.04598	3.64877e-05	CCL24, CCL7, CCL4L2, CCL4, CCL3, TNF, CXCL5	55	100	8534	10.8615	0.00683634	0.00685969	0.00660427
KEGG_PATHWAY	hsa04060:Cytokine-cytokine receptor interaction	10	11.4943	9.11641e-05	CCL24, CCL7, CCL4L2, CCL4, IL21R, CCL3, IL7R, TNF, CSF2RA, CXCL5	55	298	8534	5.20683	0.0169936	0.00856943	0.00825035
KEGG_PATHWAY	hsa04064:NF-kappa B signaling pathway	6	6.89655	0.000502094	LYN, CCL4L2, CCL4, CD14, TNF, ICAM1	55	105	8534	8.86649	0.0900971	0.0314645	0.030293
KEGG_PATHWAY	hsa04668:TNF signaling pathway	6	6.89655	0.000888265	MMP14, ITCH, TNF, CXCL5, CREB5, ICAM1	55	119	8534	7.82338	0.153858	0.0417484	0.040194
KEGG_PATHWAY	hsa04062:Chemokine signaling pathway	7	8.04598	0.00129622	LYN, CCL24, CCL7, CCL4L2, CCL4, CCL3, CXCL5	55	193	8534	5.6277	0.216393	0.0487379	0.0469232
KEGG_PATHWAY	hsa04610:Complement and coagulation cascades	5	5.74713	0.00225389	THBD, PROCR, C1QA, SERPINA1, VSIG4	55	88	8534	8.81612	0.345713	0.0617428	0.0594439
KEGG_PATHWAY	hsa05417:Lipid and atherosclerosis	7	8.04598	0.00229894	LYN, CASP9, CCL3, CD14, TNF, HSPA1B, ICAM1	55	216	8534	5.02845	0.351243	0.0617428	0.0594439
KEGG_PATHWAY	hsa05163:Human cytomegalovirus infection	7	8.04598	0.00288316	PTGER4, CASP9, CCL4L2, CCL4, CCL3, TNF, CREB5	55	226	8534	4.80595	0.418891	0.0677543	0.0652315
KEGG_PATHWAY	hsa04620:Toll-like receptor signaling pathway	5	5.74713	0.00487684	CCL4L2, CCL4, CCL3, CD14, TNF	55	109	8534	7.1176	0.601117	0.0985055	0.0948377
KEGG_PATHWAY	hsa05134:Legionellosis	4	4.5977	0.00523965	CASP9, CD14, TNF, HSPA1B	55	56	8534	11.0831	0.627547	0.0985055	0.0948377
KEGG_PATHWAY	hsa05133:Pertussis	4	4.5977	0.0130444	C1QA, CD14, TNF, CXCL5	55	78	8534	7.95711	0.915286	0.22294	0.214639
KEGG_PATHWAY	hsa05323:Rheumatoid arthritis	4	4.5977	0.0220191	CCL3, TNF, CXCL5, ICAM1	55	95	8534	6.53321	0.984791	0.344967	0.332122
KEGG_PATHWAY	hsa04640:Hematopoietic cell lineage	4	4.5977	0.0251639	CD14, IL7R, TNF, CSF2RA	55	100	8534	6.20655	0.991699	0.363909	0.350359
KEGG_PATHWAY	hsa05152:Tuberculosis	5	5.74713	0.0276679	CASP9, CD209, CARD9, CD14, TNF	55	182	8534	4.26274	0.994881	0.371541	0.357707
KEGG_PATHWAY	hsa05145:Toxoplasmosis	4	4.5977	0.0336497	CASP9, LAMB3, TNF, HSPA1B	55	112	8534	5.54156	0.998396	0.421743	0.406039
KEGG_PATHWAY	hsa05418:Fluid shear stress and atherosclerosis	4	4.5977	0.0594894	THBD, TRPV4, TNF, ICAM1	55	141	8534	4.40181	0.99999	0.692009	0.666242
KEGG_PATHWAY	hsa04936:Alcoholic liver disease	4	4.5977	0.0625753	C1QA, CD14, ACACB, TNF	55	144	8534	4.3101	0.999995	0.692009	0.666242
KEGG_PATHWAY	hsa05020:Prion disease	5	5.74713	0.0983547	CASP9, C1QA, TNF, HSPA1B, CREB5	55	278	8534	2.79071	1	1	0.967914

## Sheet: SAD_Reactome
Category	Term	Count	%	PValue	Genes	List Total	Pop Hits	Pop Total	Fold Enrichment	Bonferroni	Benjamini	FDR
REACTOME_PATHWAY	R-HSA-162582~Signal Transduction	26	29.8851	0.00154595	PTGER4, DOCK3, CCL4L2, RASGRF1, GPR84, CHD3, OSBPL11, TNF, CSF2RA, CXCL5, CASP9, HHAT, CCL7, CCL4, CCL3, PLTP, LYN, MMP7, LAMB3, S100B, MYO9A, ITCH, MMP14, FABP5, ALDH1A1, HBEGF	63	2628	11494	1.80501	0.479463	0.275678	0.275678
REACTOME_PATHWAY	R-HSA-168256~Immune System	23	26.4368	0.00155871	LYN, VASP, C1QA, SIGLEC14, SERPINA1, CARD9, GPR84, S100B, TNF, CSF2RA, ICAM1, CASP9, ITCH, VNN1, FABP5, CD209, CCL4, CLEC5A, CCL3, IL21R, CD14, IL7R, HSPA1B	63	2177	11494	1.92753	0.482264	0.275678	0.275678
REACTOME_PATHWAY	R-HSA-6783783~Interleukin-10 signaling	4	4.5977	0.00204676	CCL4, CCL3, TNF, ICAM1	63	47	11494	15.5272	0.578788	0.275678	0.275678
REACTOME_PATHWAY	R-HSA-168249~Innate Immune System	15	17.2414	0.00274734	LYN, C1QA, SIGLEC14, SERPINA1, CARD9, GPR84, S100B, CASP9, ITCH, VNN1, FABP5, CD209, CLEC5A, CD14, HSPA1B	63	1150	11494	2.37971	0.686818	0.275678	0.275678
REACTOME_PATHWAY	R-HSA-449147~Signaling by Interleukins	9	10.3448	0.00362267	LYN, CCL4, IL21R, CCL3, IL7R, S100B, TNF, CSF2RA, ICAM1	63	471	11494	3.4862	0.783798	0.275678	0.275678
REACTOME_PATHWAY	R-HSA-380108~Chemokine receptors bind chemokines	4	4.5977	0.0039196	CCL7, CCL4, CCL3, CXCL5	63	59	11494	12.3691	0.809351	0.275678	0.275678
REACTOME_PATHWAY	R-HSA-6798695~Neutrophil degranulation	8	9.1954	0.0159076	SERPINA1, SIGLEC14, VNN1, FABP5, CLEC5A, CD14, GPR84, HSPA1B	63	490	11494	2.97868	0.998849	0.89095	0.89095
REACTOME_PATHWAY	R-HSA-168638~NOD1/2 Signaling Pathway	3	3.44828	0.0168901	CASP9, ITCH, CARD9	63	37	11494	14.7928	0.999245	0.89095	0.89095
REACTOME_PATHWAY	R-HSA-1280215~Cytokine Signaling in Immune system	10	11.4943	0.0269923	LYN, CCL4, IL21R, CCL3, IL7R, S100B, TNF, CSF2RA, HSPA1B, ICAM1	63	801	11494	2.27771	0.99999	1	1
REACTOME_PATHWAY	R-HSA-168643~Nucleotide-binding domain, leucine rich repeat containing receptor (NLR) signaling pathways	3	3.44828	0.0377936	CASP9, ITCH, CARD9	63	57	11494	9.60234	1	1	1
REACTOME_PATHWAY	R-HSA-1236394~Signaling by ERBB4	3	3.44828	0.03901	ITCH, S100B, HBEGF	63	58	11494	9.43678	1	1	1
REACTOME_PATHWAY	R-HSA-9006931~Signaling by Nuclear Receptors	5	5.74713	0.0760301	MMP7, FABP5, ALDH1A1, PLTP, HBEGF	63	297	11494	3.07146	1	1	1
REACTOME_PATHWAY	R-HSA-372790~Signaling by GPCR	8	9.1954	0.0895426	PTGER4, CCL7, CCL4L2, CCL4, CCL3, GPR84, CXCL5, HBEGF	63	716	11494	2.03849	1	1	1
REACTOME_PATHWAY	R-HSA-202733~Cell surface interactions at the vascular wall	4	4.5977	0.0943074	LYN, THBD, PROCR, SLC7A11	63	201	11494	3.63074	1	1	1
REACTOME_PATHWAY	R-HSA-375276~Peptide ligand-binding receptors	4	4.5977	0.0953764	CCL7, CCL4, CCL3, CXCL5	63	202	11494	3.61276	1	1	1

## Sheet: SAD_Wikipathways
Category	Term	Count	%	PValue	Genes	List Total	Pop Hits	Pop Total	Fold Enrichment	Bonferroni	Benjamini	FDR
WIKIPATHWAYS	WP5095:Overview of proinflammatory and profibrotic mediators	7	8.04598	0.000154261	CCL24, CCL7, CCL4L2, CCL4, CCL3, TNF, CXCL5	57	129	8832	8.408	0.0410941	0.0251654	0.0248879
WIKIPATHWAYS	WP5473:Cytokine cytokine receptor interaction	9	10.3448	0.00018504	CCL24, CCL7, CCL4L2, CCL4, IL21R, CCL3, IL7R, TNF, CXCL5	57	255	8832	5.46873	0.0490897	0.0251654	0.0248879
WIKIPATHWAYS	WP3929:Chemokine signaling	6	6.89655	0.00379401	LYN, CCL24, CCL7, CCL4, CCL3, CXCL5	57	165	8832	5.63445	0.644395	0.323782	0.320211
WIKIPATHWAYS	WP5115:Network map of SARS CoV 2 signaling	7	8.04598	0.00519575	CASP9, ITCH, CCL4, CCL3, CD14, TNF, CXCL5	57	254	8832	4.2702	0.757543	0.323782	0.320211
WIKIPATHWAYS	WP3624:Lung fibrosis	4	4.5977	0.00732835	SERPINA1, CCL4, CCL3, TNF	57	63	8832	9.83793	0.864753	0.323782	0.320211
WIKIPATHWAYS	WP4329:miRNA role in immune response in sepsis	4	4.5977	0.0076546	CCL4, CCL3, TNF, ICAM1	57	64	8832	9.68421	0.876321	0.323782	0.320211
WIKIPATHWAYS	WP5039:SARS CoV 2 innate immunity evasion and cell specific immune response	4	4.5977	0.00833264	CCL4, CCL3, TNF, CXCL5	57	66	8832	9.39075	0.897303	0.323782	0.320211
WIKIPATHWAYS	WP5092:Interactions of natural killer cells in pancreatic cancer	3	3.44828	0.0134305	CCL4, CCL3, TNF	57	28	8832	16.6015	0.974723	0.417015	0.412416
WIKIPATHWAYS	WP2882:Nuclear receptors meta pathway	7	8.04598	0.014033	SULT1A1, THBD, SERPINA1, SLC7A11, PLTP, TNF, HBEGF	57	314	8832	3.45424	0.978592	0.417015	0.412416
WIKIPATHWAYS	WP129:Matrix metalloproteinases	3	3.44828	0.0153314	MMP14, MMP7, TNF	57	30	8832	15.4947	0.985041	0.417015	0.412416
WIKIPATHWAYS	WP5088:Prostaglandin signaling	3	3.44828	0.0183854	PTGER4, CCL3, TNF	57	33	8832	14.0861	0.993574	0.45462	0.449605
WIKIPATHWAYS	WP75:Toll like receptor signaling	4	4.5977	0.0221639	CCL4, CCL3, CD14, TNF	57	95	8832	6.5241	0.997749	0.502382	0.496841
WIKIPATHWAYS	WP5287:17q12 copy number variation syndrome	4	4.5977	0.0259877	CCL7, CCL4L2, CCL4, CCL3	57	101	8832	6.13653	0.999225	0.513025	0.507367
WIKIPATHWAYS	WP3941:Oxidative damage response	3	3.44828	0.0264057	CASP9, C1QA, TNF	57	40	8832	11.6211	0.99931	0.513025	0.507367
WIKIPATHWAYS	WP98:Prostaglandin synthesis and regulation	3	3.44828	0.0328491	PTGER4, ANXA6, PTGS1	57	45	8832	10.3298	0.999887	0.595663	0.589094
WIKIPATHWAYS	WP5258:ROS in COVID 19 endothelial dysfunction	2	2.29885	0.0496324	TNF, ICAM1	57	8	8832	38.7368	0.999999	0.811221	0.802274
WIKIPATHWAYS	WP558:Complement and coagulation cascades	3	3.44828	0.052071	THBD, C1QA, SERPINA1	57	58	8832	8.01452	1	0.811221	0.802274
WIKIPATHWAYS	WP3896:Dengue 2 interactions with complement and coagulation cascades	3	3.44828	0.0536837	THBD, C1QA, SERPINA1	57	59	8832	7.87868	1	0.811221	0.802274
WIKIPATHWAYS	WP2324:AGE RAGE pathway	3	3.44828	0.0654534	CASP9, MMP14, MMP7	57	66	8832	7.04306	1	0.917896	0.907772
WIKIPATHWAYS	WP5158:Urotensin II mediated signaling	3	3.44828	0.07074	CASP9, TNF, ICAM1	57	69	8832	6.73684	1	0.917896	0.907772
WIKIPATHWAYS	WP382:MAPK signaling	5	5.74713	0.070867	RASGRF1, CD14, CACNA2D4, TNF, HSPA1B	57	247	8832	3.13659	1	0.917896	0.907772
WIKIPATHWAYS	WP4538:Regulatory circuits of STAT3 signaling	3	3.44828	0.0873843	IL21R, IL7R, CSF2RA	57	78	8832	5.95951	1	1	0.99262
WIKIPATHWAYS	WP5182:Pro survival signaling of neuroprotectin D1	2	2.29885	0.0910702	CASP9, TNF	57	15	8832	20.6596	1	1	0.99262
WIKIPATHWAYS	WP4891:COVID 19 adverse outcome pathway	2	2.29885	0.0968432	CCL3, TNF	57	16	8832	19.3684	1	1	0.99262
