# Supplementary material
Source: Research Square preprint supplement (doi:10.21203/rs.3.rs-9325069/v1)
Supplement: Supplementary file 3 [file 8eb4f0f7726b8d90f76a5884.docx]

**Supplementary Table 1.** Characteristics of the study participants

| **Variable** | **HC** | **OCD** | **SAD** | **p-value** |
| --- | --- | --- | --- | --- |
| Age | 28.5 ± 5.4 | 30.4 ± 10.9 | 26.7 ± 5.4 | ns |
| Sex, male/female | 11/9 | 11/8 | 9/7 |  |
| BAI | 3.2 ± 2.4 | 16.6 ± 9.2 | 15.6 ± 10.0 | ns |
| BDI | 4.2 ± 3.7 | 15.0 ± 10.1 | 22.0 ± 9.0 | P<0.05 (*)  OCD vs. SAD |
| Y-BOCS |  | 20.5 ± 8.8 |  |  |
| DOCS |  | 22.9±12.2 |  |  |
| OCI-R-K |  | 24.9±13.5 |  |  |
| BFNE |  |  | 51.0 ± 5.4 |  |
| LSAS |  |  | 83.5 ± 11.8 |  |
| Medication, yes/no |  | 17/2 | 1/15 |  |
|  |  |  |  |  |
|  |  |  |  |  |

Four additional OCD participants used exclusively for BTZ validation experiments (Figure 5) were excluded in this table

P values indicate comparisons between the OCD and SAD groups only. Continuous variables were analyzed using unpaired two-tailed Welch’s t-tests, and categorical variables were analyzed using Fisher’s exact test. **p* < 0.05, ** *p* < 0.01, *** *p* < 0.001.

| **Participants** | **Sex** | **Age** | **Y-BOCS** | **DOCS** | **OCI-R-K** | **BAI** | **BDI** | **Medication** | **Phagocytosed**  **bead** | **Phagocytosed**  **zymosan** | **Plasma CRP**  **(ng/mL)** |
| --- | --- | --- | --- | --- | --- | --- | --- | --- | --- | --- | --- |
| OCD1 | M | 19 | 26 | 15 | 32 | 15 | 7 | X | 9.3 | 6.3 | 10.93 |
| OCD2 | F | 45 | 23 | 32 | 16 | 26 | 10 | O | 10.4 | 7.7 | 6276.00 |
| OCD3 | M | 22 | 28 | 31 | 22 | 16 | 6 | O | 18.1 | 14.1 | 335.00 |
| OCD4 | M | 37 | 37 | 50 | 60 | 34 | 36 | O | 13.4 | 7.0 | 124.90 |
| OCD5 | F | 28 | 23 | 32 | 45 | 30 | 28 | O | 10.7 | 6.7 | 125.50 |
| OCD6 | M | 24 | 26 | 21 | 8 | 22 | 19 | O | 13.9 | 5.4 | 323.90 |
| OCD7 | M | 32 | 24 | 12 | 28 | 3 | 4 | O | 20.9 | 0.0 | 205.50 |
| OCD8 | M | 19 | 28 | 30 | 30 | 22 | 33 | O | 36.1 | 6.7 | 180.20 |
| OCD9 | F | 51 | 7 | 9 | 10 | 8 | 6 | O | 47.9 | 4.7 | 623.40 |
| OCD10 | F | 22 | 23 | 30 | 30 | 14 | 18 | O | 57.6 | 8.4 | 138.50 |
| OCD11 | M | 19 | 33 | 40 | 9 | 15 | 23 | O | 46.0 | 13.2 | 2720.00 |
| OCD12 | F | 20 | 25 | 23 | 46 | 17 | 14 | O | 97.8 | 11.0 | 25.42 |
| OCD13 | F | 19 | 11 | 20 | 17 | 7 | 2 | O | 51.4 | 11.1 | 79.62 |
| OCD14 | M | 33 | 8 | 9 | 16 | 29 | 23 | O | 59.7 | 16.8 | 164.30 |
| OCD15 | F | 36 | 20 | 27 | 23 | 15 | 17 | O | 51.5 | 17.6 | 26.67 |
| OCD16 | M | 34 | 14 | 18 | 23 | 6 | 6 | O | 172.8 | 13.0 | 23.87 |
| OCD17 | M | 44 | 6 | 10 | 18 | 21 | 9 | O | 72.7 | 11.4 | 294.70 |
| OCD18 | F | 50 | 16 | 0 | 17 | 15 | 19 | O | 139.0 | 12.6 | 10.29 |
| OCD19 | M | 24 | 13 | 27 | 23 | 1 | 6 | X | 87.8 | 10.8 | 1857.00 |
| Mean±SD |  | 30.4±10.9 | 20.5±8.8 | 22.9±12.2 | 24.9±13.5 | 16.6±9.2 | 15.0±10.1 |  | 53.5±45.1 | 9.7±4.4 |  |

OCD, obsessive compulsive disorder; Y-BOCS, yale-brown obsessive compulsive scale; DOCS, dimensional obsessive-compulsive scale; OCI, obsessive compulsive inventory; BAI, beck anxiety inventory; BDI, beck depression inventory; CRP, C-reactive protein

Four additional OCD participants used exclusively for BTZ validation experiments (Figure 5) are not included in this table

| **Participants** | **Sex** | **Age** | **BFNE** | **LSAS** | **BAI** | **BDI** | **Medication** | **Phagocytosed**  **bead** | **Phagocytosed**  **zymosan** | **Plasma CRP**  **(ng/mL)** |
| --- | --- | --- | --- | --- | --- | --- | --- | --- | --- | --- |
| SAD1 | M | 21 | 59 | 76 | 11 | 11 | X | 6.9 | 5.1 | 2145.00 |
| SAD2 | M | 31 | 42 | 68 | 12 | 14 | X | 7.2 | 3.7 | 12.86 |
| SAD3 | M | 22 | 45 | 74 | 21 | 25 | X | 3.3 | 0.0 | 52.17 |
| SAD4 | M | 20 | 55 | 88 | 16 | 21 | X | 33.2 | 9.7 | 878.40 |
| SAD5 | M | 23 | 45 | 104 | 37 | 40 | X | 20.3 | 2.9 | 345.60 |
| SAD6 | M | 32 | 54 | 97 | 12 | 27 | X | 16.7 | 3.8 | 25.74 |
| SAD7 | M | 27 | 58 | 84 | 5 | 11 | O | 46.6 | 11.3 | 226.60 |
| SAD8 | M | 38 | 48 | 64 | 24 | 27 | X | 31.8 | 15.3 | 647.10 |
| SAD9 | M | 28 | 47 | 91 | 6 | 22 | X | 49.1 | 18.0 | 237.50 |
| SAD10 | F | 33 | 42 | 76 | 2 | 12 | X | 95.5 | 5.1 | 24.80 |
| SAD11 | F | 22 | 54 | 83 | 20 | 21 | X | 39.9 | 14.2 | 14.45 |
| SAD12 | F | 32 | 52 | 70 | 22 | 28 | X | 10.8 | 13.0 | 278.20 |
| SAD13 | F | 30 | 53 | 91 | 31 | 37 | X | 28.0 | 7.3 | 1366.00 |
| SAD14 | F | 23 | 54 | 91 |  |  | X | 45.8 | 5.7 | 57.06 |
| SAD15 | F | 26 | 55 | 79 | 5 | 22 | X | 32.3 | 10.3 | 317.50 |
| SAD16 | F | 20 | 53 | 101 | 11 | 12 | X | 14.0 | 2.2 | 2758.00 |
| Mean±SD |  | 26.7±5.4 | 51±5.4 | 83.5±11.8 | 15.6±10 | 22±9 |  | 30.1±23.0 | 8.0±5.3 |  |

SAD, social anxiety disorder; Y-BOCS, yale-brown obsessive compulsive scale; BFNE, brief fear of negative evaluation; LSAS, liebowitz social anxiety scale; BAI, beck anxiety inventory; BDI, beck depression inventory; CRP, C-reactive protein

| **Participants** | **Sex** | **Age** | **BDI** | **BAI** | **Phagocytosed**  **bead** | **Phagocytosed**  **zymosan** | **Plasma CRP**  **(ng/mL)** |
| --- | --- | --- | --- | --- | --- | --- | --- |
| HC1 | M | 32 | 5 | 4 | 31.0 | 15.4 | 338.40 |
| HC2 | M | 24 | 4 | 3 | 48.3 | 5.3 | 70.17 |
| HC3 | M | 24 | 4 | 3 | 73.4 | 16.5 | 36.24 |
| HC4 | M | 31 | 2 | 0 | 113.8 | 8.2 | 663.20 |
| HC5 | M | 34 | 0 | 0 | 204.4 | 17.2 | 3541.00 |
| HC6 | F | 32 | 2 | 3 | 96.8 | 18.5 | 388.30 |
| HC7 | M | 26 | 0 | 5 | 159.8 | 9.3 | 165.50 |
| HC8 | M | 23 | 0 | 0 | 69.6 | 22.6 | 49.12 |
| HC9 | M | 28 | 9 | 5 | 43.6 | 31.3 | 140.00 |
| HC10 | F | 33 | 0 | 0 |  | 6.2 | 668.50 |
| HC11 | M | 35 | 4 | 3 | 29.1 | 16.6 | 280.20 |
| HC12 | M | 22 | 4 | 3 | 35.0 | 12.4 | 22.31 |
| HC13 | M | 31 | 4 | 3 | 24.2 | 10.1 | 190.30 |
| HC14 | F | 36 | 1 | 5 | 29.2 | 7.6 | 127.70 |
| HC15 | F | 34 | 7 | 3 | 26.0 | 6.8 | 606.30 |
| HC16 | F | 22 | 15 | 3 | 22.2 | 12.5 | 134.20 |
| HC17 | F | 35 | 5 | 4 | 35.5 | 26.2 | 59.19 |
| HC18 | F | 19 | 5 | 3 | 31.0 | 12.3 | 23.87 |
| HC19 | F | 27 | 9 | 3 | 48.3 | 27.7 | 26.05 |
| HC20 | F | 22 | 5 | 11 | 73.4 | 7.8 | 345.90 |
| Average |  | 28.5±5.4 | 4.2±3.7 | 3.2±2.4 | 62.9±49.8 | 14.5±7.6 |  |

HC, healthy control; BAI, beck anxiety inventory; BDI, beck depression inventory; CRP, C-reactive protein

Four additional HC participants used exclusively for BTZ validation experiments (Figure 5) are not included in this table
