# Supplementary material
Source: Research Square preprint supplement (doi:10.21203/rs.3.rs-9325069/v1)
Supplement: Supplementary file 4 [file eb045fa78dd4761ecd1f8bc7.docx]

**Supplementary Table 4. Correlations between microglia-like cell markers and clinical symptom severity in patients with OCD**

| **Symptom severity** | |  | **MDM2** | **Phagocytosed beads** | **Phagocytosed zymosan** |
| --- | --- | --- | --- | --- | --- |
| **obsessive-compulsive symptom** | **Y-BOCS** | Correlation Coefficient | -0.3017 | **-0.5664** | -0.2005 |
| Sig. (two-tailed) | 0.2094 | **0.0115 *** | 0.4104 |
| N | 19 | **19** | 19 |
| **DOCS** | Correlation Coefficient | **-0.4605** | **-0.4728** | 0.0167 |
| Sig. (two-tailed) | **0.0473 *** | **0.0409 *** | 0.9459 |
| N | **19** | **19** | 19 |
| **OCI-R** | Correlation Coefficient | 0.1258 | -0.08975 | -0.2138 |
| Sig. (two-tailed) | 0.6078 | 0.7148 | 0.3794 |
| N | 19 | 19 | 19 |
| **anxiety symptom** | **BAI** | Correlation Coefficient | -0.2054 | -0.4363 | -0.008815 |
| Sig. (two-tailed) | 0.399 | 0.0618 | 0.9714 |
| N | 19 | 19 | 19 |
| **depressive symptom** | **BDI** | Correlation Coefficient | -0.2328 | -0.1843 | 0.04497 |
| Sig. (two-tailed) | 0.3375 | 0.45 | 0.8549 |
| N | 19 | 19 | 19 |

Four additional OCD participants used exclusively for BTZ validation experiments (Figure 5) were excluded from this table.

All clinical measures (Y-BOCS, DOCS, OCI-R, BAI, BDI) represent total scores

* P < 0.05

OCD, obsessive compulsive disorder; MDM2, mouse double minute 2; Y-BOCS, Yale-Brown obsessive-compulsive scale; DOCS, dimensional obsessive-compulsive scale; OCI-R-K, Korean version of the obsessive–compulsive inventory–revised; BAI, Beck anxiety inventory; BDI, Beck depression inventory
